# Supplementary material for: Characterization of a Bacterial Symbiont Asaia sp. in the White-Backed Planthopper, Sogatella furcifera, and Its Effects on Host Fitness
Source: Front Microbiol. 2019 Sep 18;10:2179. doi: 10.3389/fmicb.2019.02179 (PMC6759652; doi:10.3389/fmicb.2019.02179)
Supplement: Supplementary file 3 [file Data_Sheet_1.XLSX]

## Sheet: Fitness of Asaia-infected WBPH
insects: Asaia-infected WBPH strain
Biological repetition	Nymphal duration of male (d)	Nymphal duration of female (d)	Weight of newly emerged male (mg)	Weight of newly emerged female (mg)	Adult longevity of male (d)	Adult longevity of female (d)	Fecundity per female	Honeydew excretion (mg/insect)
1	10	10	0.97	1.59	17.5	13	168	5.36
2	10	10	0.84	1.58	16.5	16.5	181	3.51
3	10	10.5	1.02	1.76	15	15	168	4.13
4	10	10.5	0.88	1.62	15	15	151	6.46
5	10	10.5	1.04	1.49	17	15	137	5.58
6	10	10.5	0.94	1.63	12	15	147	5.42
7	10	10.5	0.96	1.58	17	15	209	4.09
8	10.5	10.5	0.89	1.4	14	12	153	6.92
9	10.5	11	0.99	1.48	12	13	182	5.15
10	11	11	0.94	1.7	14	13.5	179	3.31
11	11	11	0.91	1.41	16	15	136	5.87
12	11	11	0.89	1.66	17	14	158	4.76
13	11	11	0.97	1.47	17	16	164	3.29
14	11	11	0.96	1.51	17	15	170	3.53
15	11	11	0.94	1.55	16	14	139	5.01
16	10.5	11	0.86	1.69	15	14	158	2.95
17	10.5	11	0.86	1.53	18	15	157	4.53
18	10.5	11	0.9	1.63	17	14	125	3.47
19	10.5	11.5	0.87	1.45	14	14	131	4.59
20	10.5	11.5	0.9	1.42	14	15	193	3.7
21	10.5	11.5	0.92	1.68	11	12.5	137	5.49
22	11	12	0.96	1.64	12.5	11.5	149	4.95
23	11.5	12	0.96	1.49	15	15	191	4.54
24	11.5	12	0.92	1.68	11	12.5	195	5.65
25	11.5	12	1.03	1.54	16	15	198	3.18
26	11.5	12	1	1.61	18	13	184	3.9
27	11.5	12	0.87	1.71	14	14	185	5.5
28	11.5	12	0.88	1.74	14	14	136	3.02
29	11.5	12	0.96	1.65	15	11.5	180	4.24
30	11.5	12	0.94	1.5	15	14.5	129	3.71

## Sheet: Fitness of Asaia-free WBPH
insects: Asaia-free WBPH strain
Biological repetition	Nymphal duration of male (d)	Nymphal duration of female (d)	Weight of newly emerged male (mg)	Weight of newly emerged female (mg)	Adult longevity of male (d)	Adult longevity of female (d)	Fecundity per female	Honeydew excretion (mg/insect)
1	10	11	0.94	1.51	16	12	184	7.79
2	10.5	11	0.83	1.57	14	14	181	7.71
3	10.5	11	0.87	1.37	13.5	12	126	7.66
4	10.5	11	0.95	1.43	14	15	166	7.33
5	10.5	11	0.96	1.38	13.5	18	198	10.44
6	11.5	11	0.96	1.53	15	18	210	6.2
7	11.5	11	0.83	1.45	18	12	155	6.71
8	11.5	11	0.87	1.57	15.5	11.5	100	11.95
9	11.5	11	0.9	1.43	14	13	118	6.05
10	11	11	0.94	1.4	13.5	12.5	134	11.41
11	11	11.5	0.86	1.3	15	13	193	7.43
12	11	11.5	0.81	1.49	15	14	107	10.19
13	11	11.5	0.93	1.51	15	15	143	5.8
14	11	11.5	0.95	1.54	14	18	206	6.38
15	11	11.5	0.79	1.33	14	16	171	10.2
16	11	11.5	0.84	1.59	18	11.5	140	5.79
17	11	11.5	0.9	1.46	14.5	18	205	6.28
18	11	12	0.83	1.53	16	10	108	7.17
19	11	12	0.85	1.29	18	19	170	9.8
20	11	12	0.84	1.47	18	12	160	9.64
21	11	12	0.93	1.52	16	11.5	171	8.63
22	11.5	12	0.93	1.52	15	11.5	167	9.92
23	11.5	12	0.96	1.46	17	14	153	5.12
24	11.5	12	0.87	1.38	14	11.5	140	7.13
25	11.5	12	0.93	1.45	15	13	182	10.7
26	11.5	12	0.79	1.57	15	15	157	13.35
27	12	12.5	0.79	1.36	16	13	187	10.38
28	12	12.5	0.81	1.37	14.5	13	176	6.52
29	12	12.5	0.83	1.31	14	11.5	127	10.14
30	12	12.5	0.82	1.36	15	13	199	11.05
